# Supplementary material for: Identification of human age-associated gene co-expressions in functional modules using liquid association
Source: PubMed Central journal article supplement (PMC5787419; doi:10.18632/oncotarget.23148), 2017-12-08
Supplement: oncotarget-09-1063-s001.pdf [file oncotarget-09-1063-s001.pdf]

# Identification of human age-associated gene co-expressions in functional modules using liquid association

## SUPPLEMENTARY MATERIALS

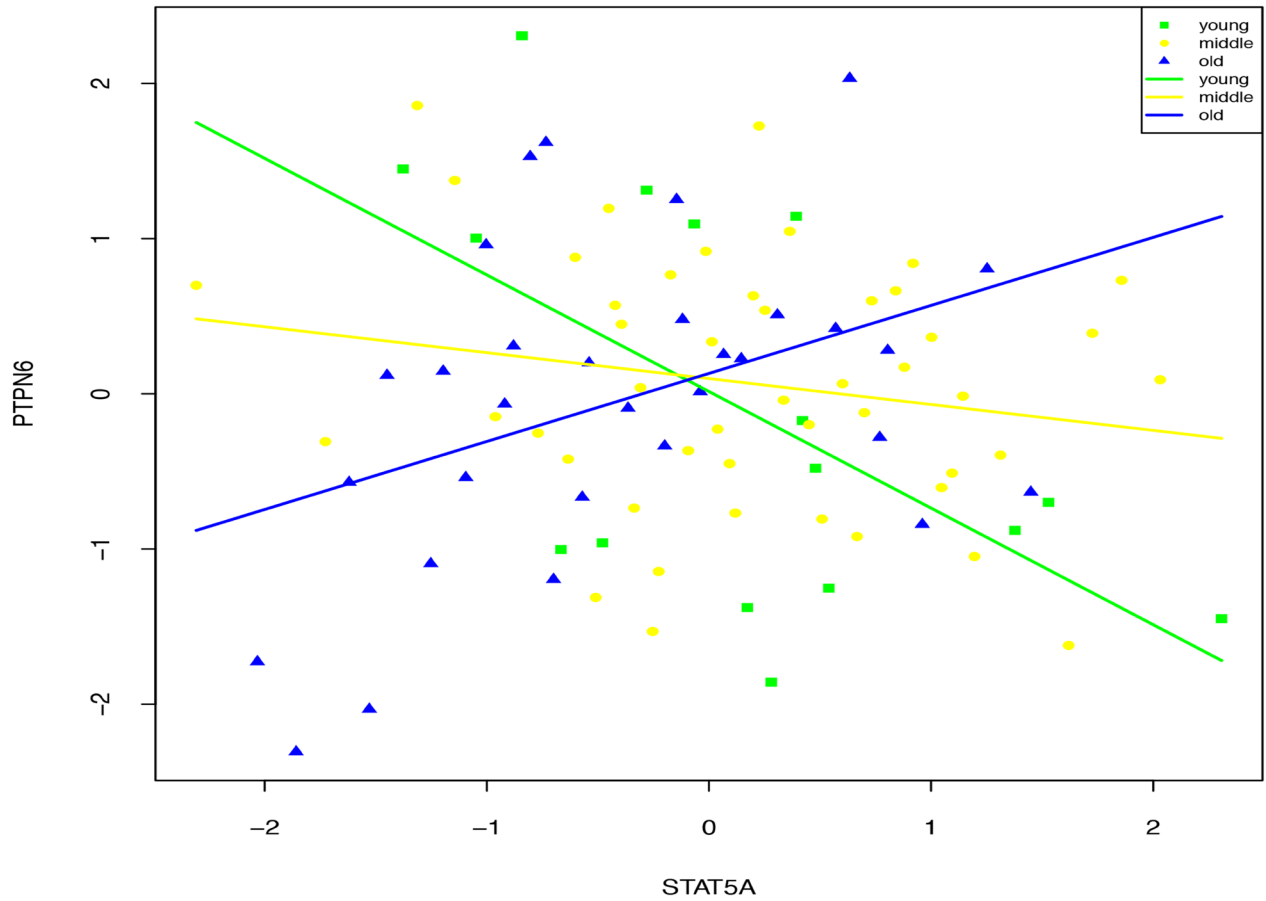

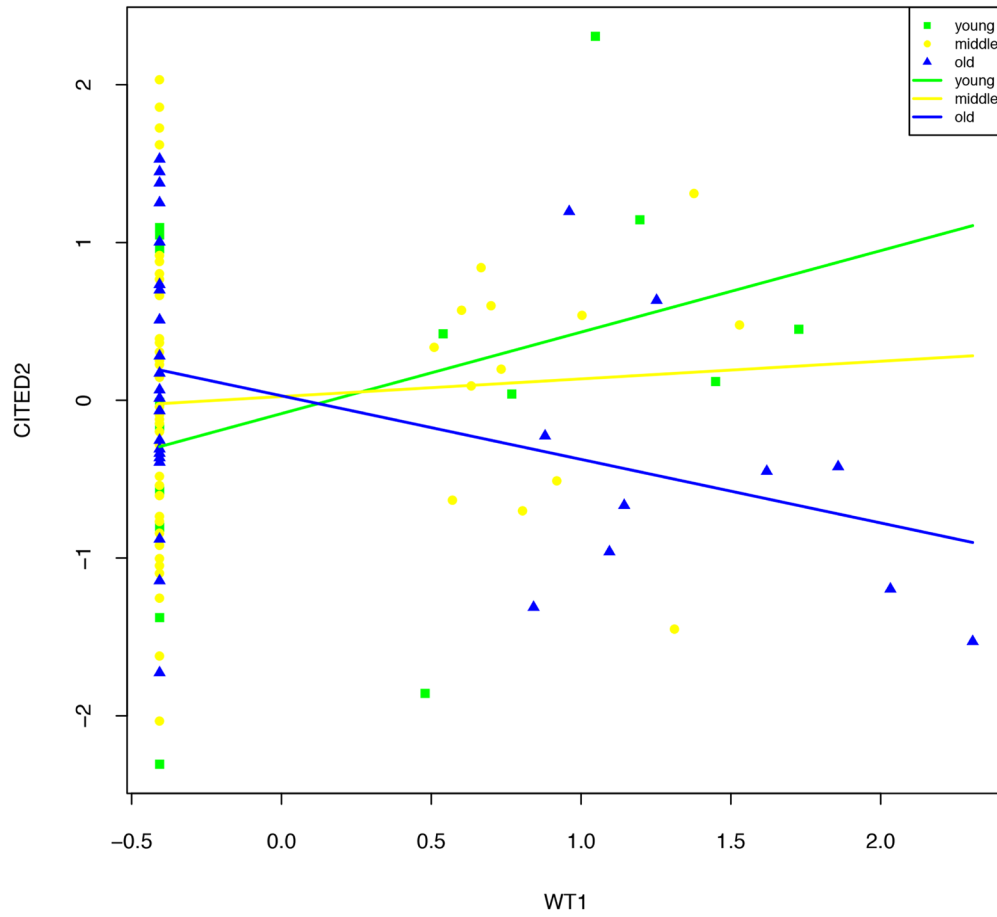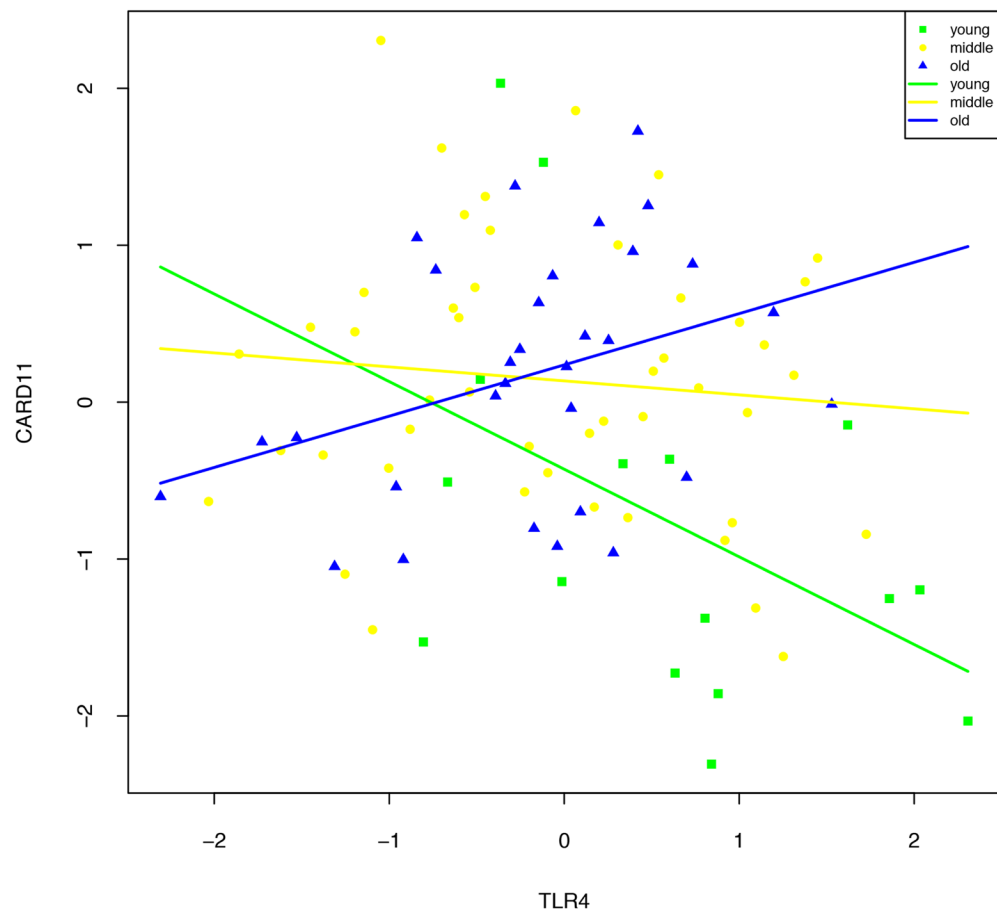

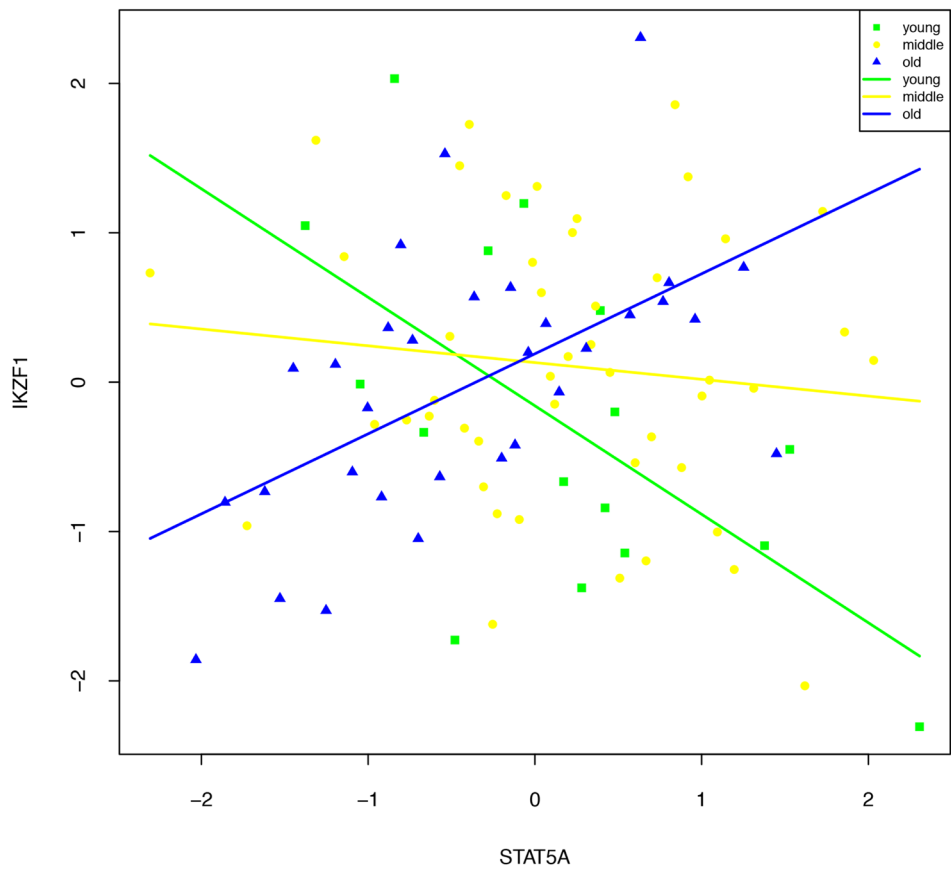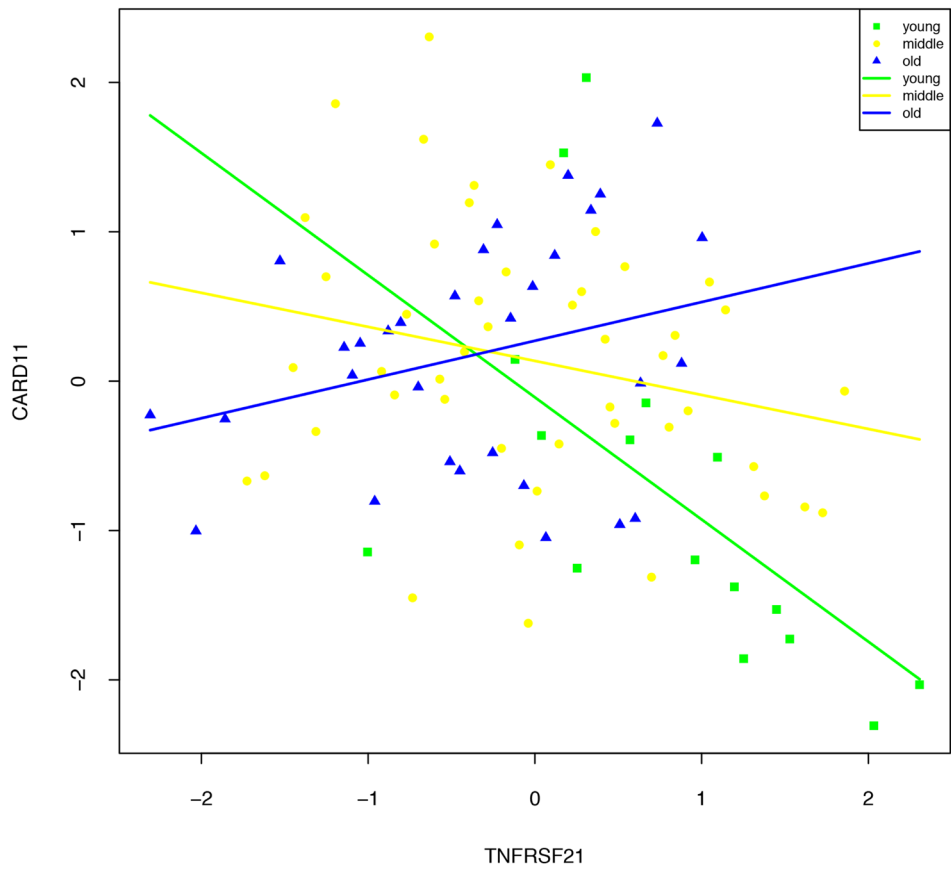

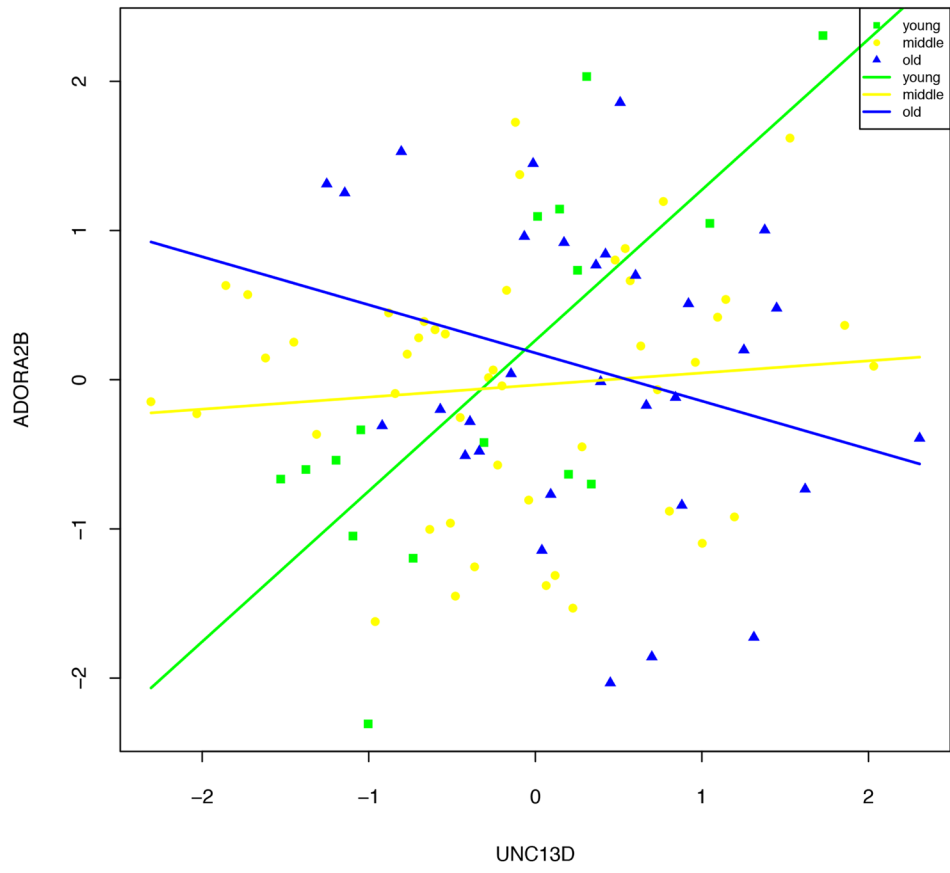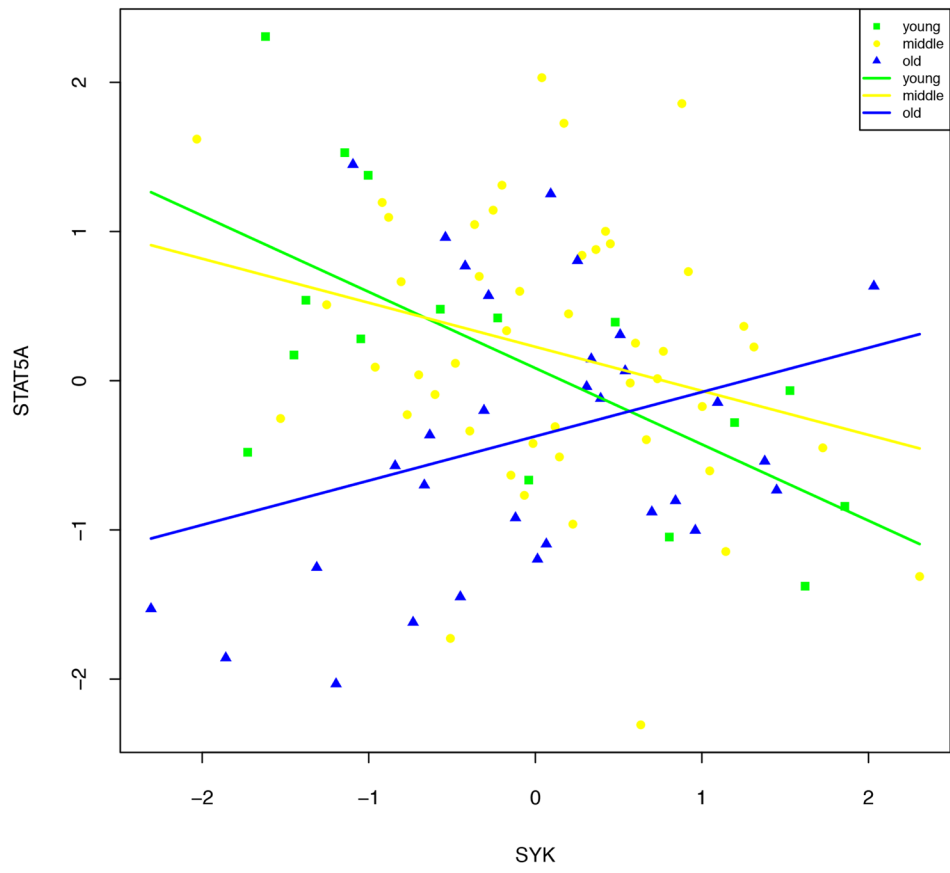

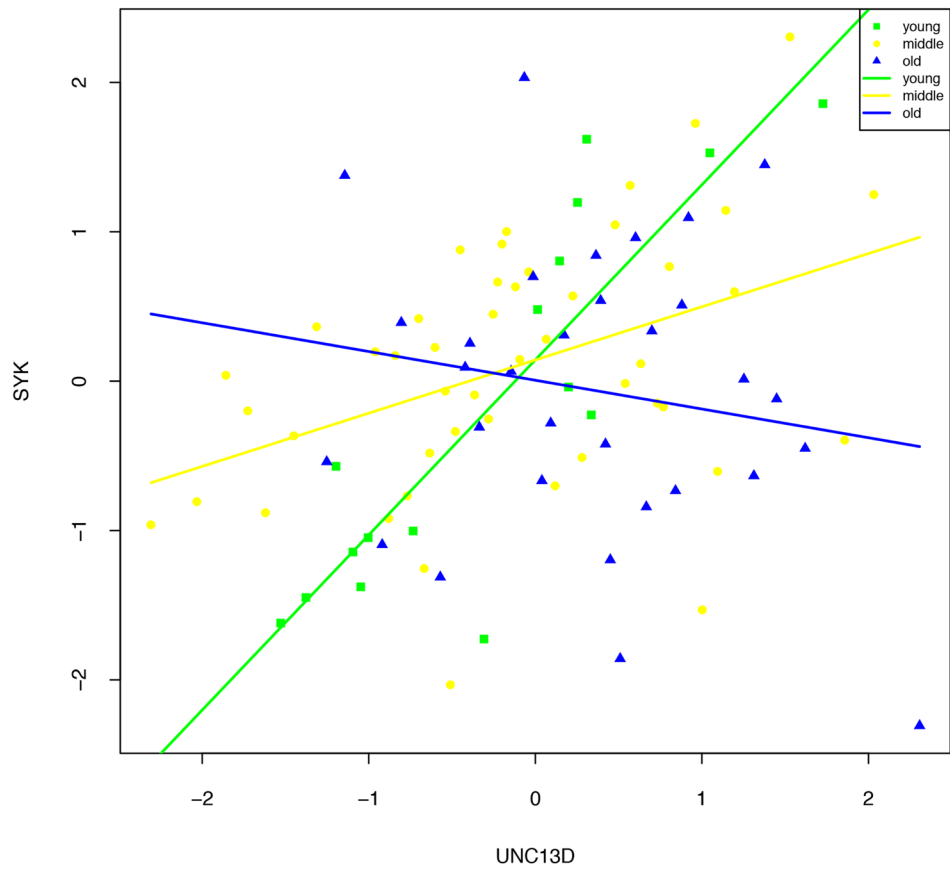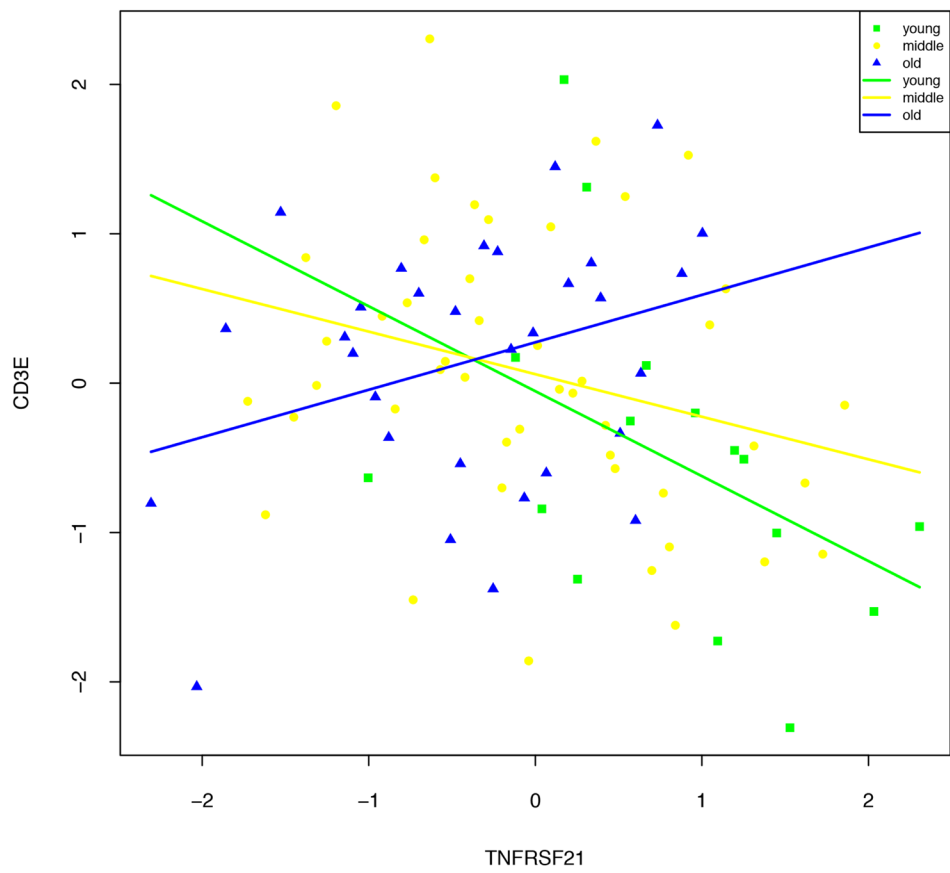

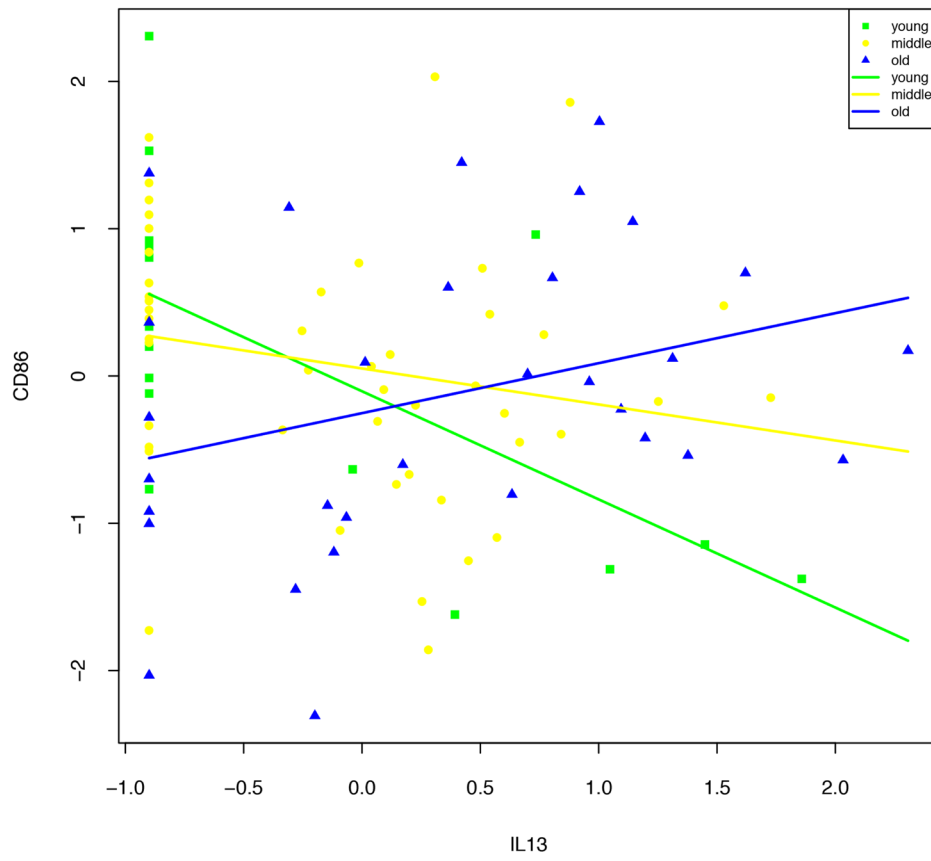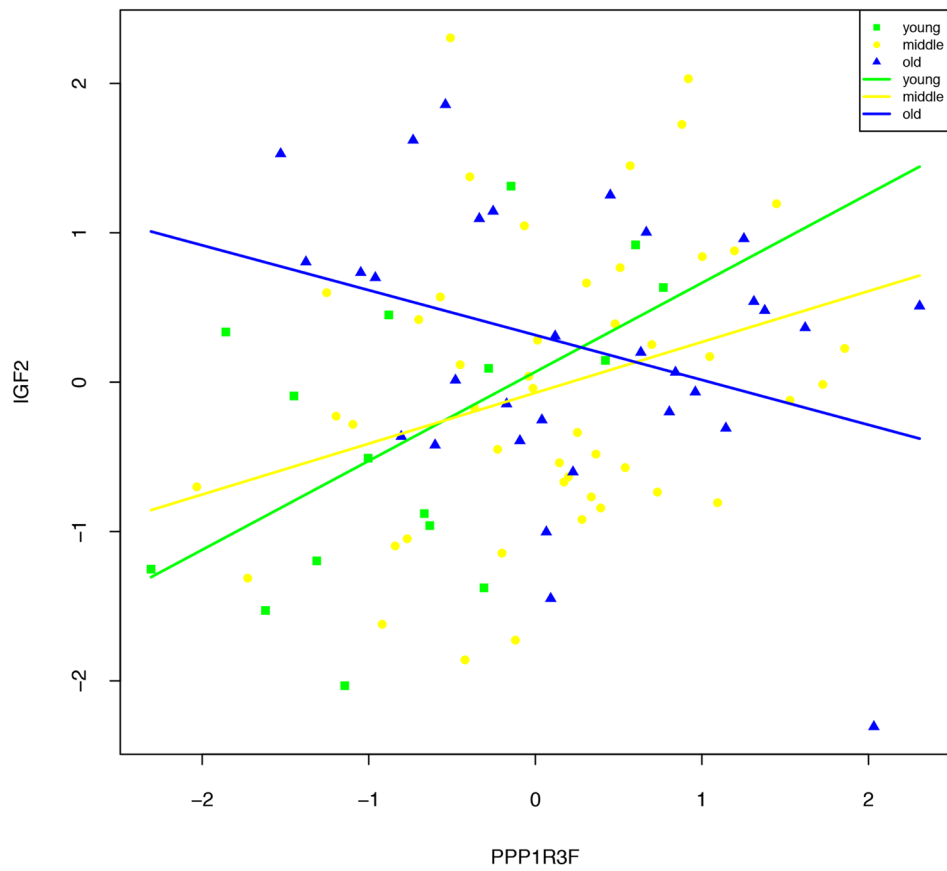

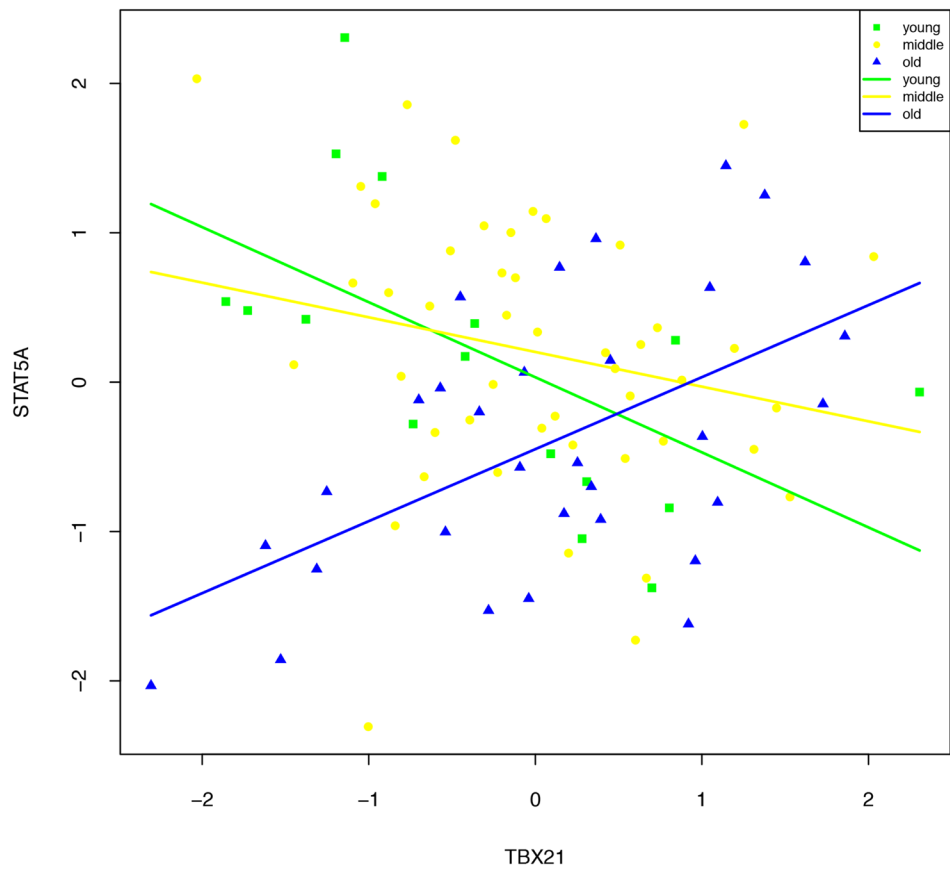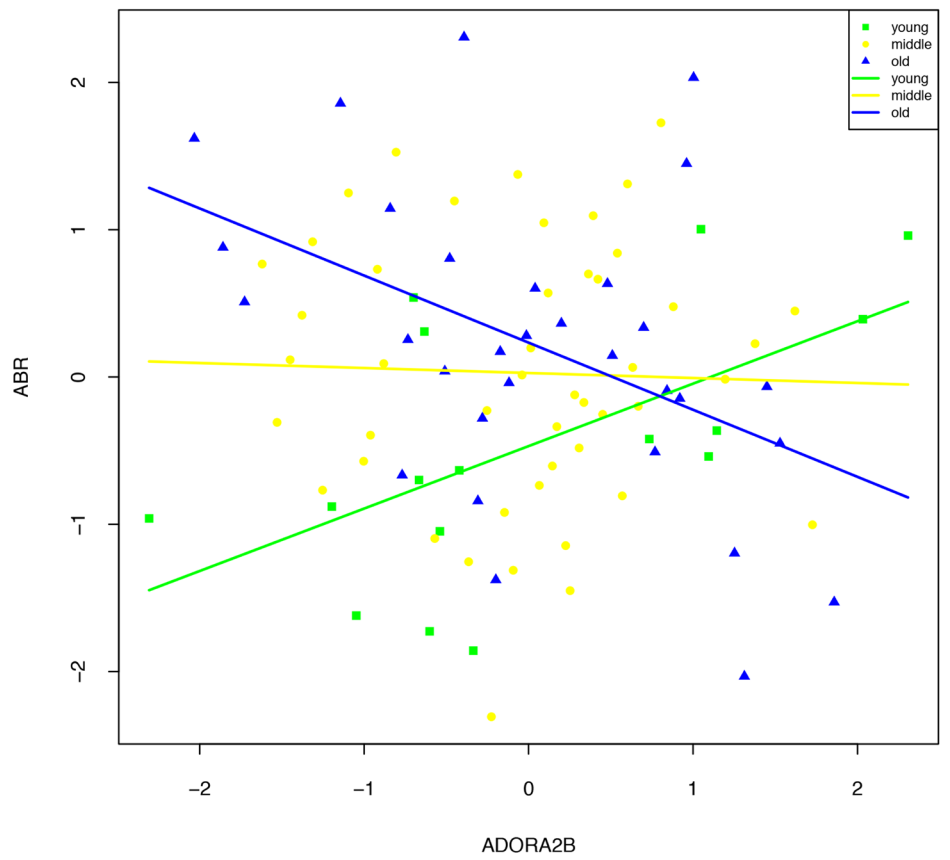

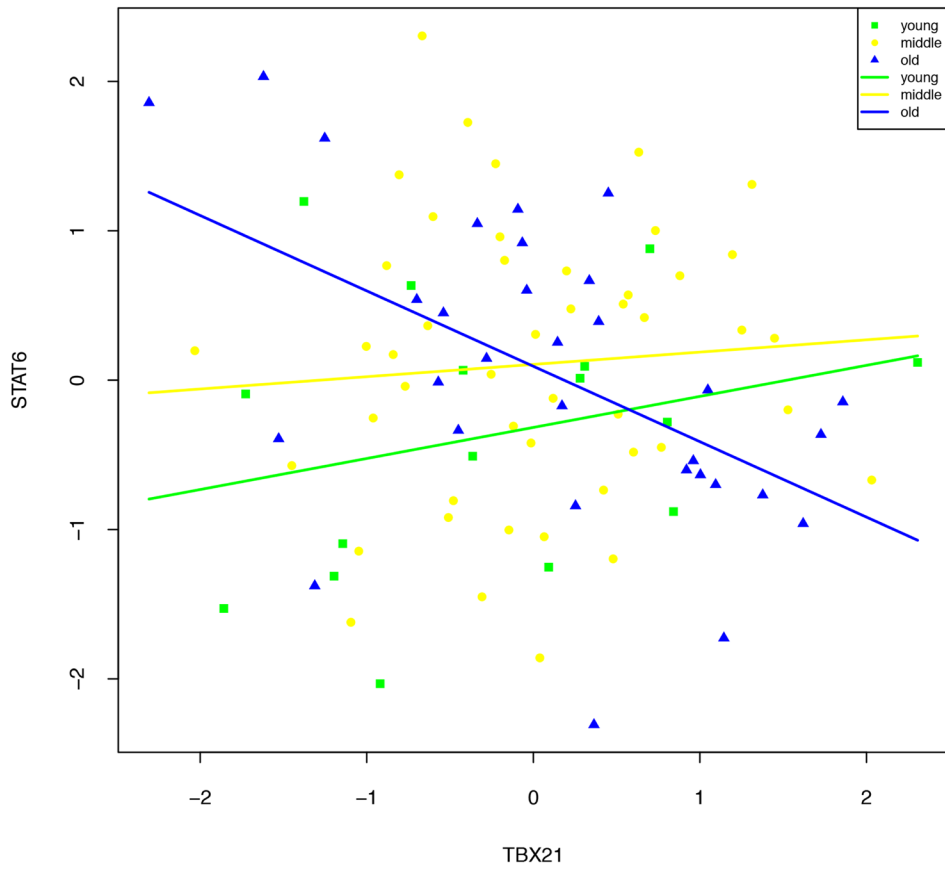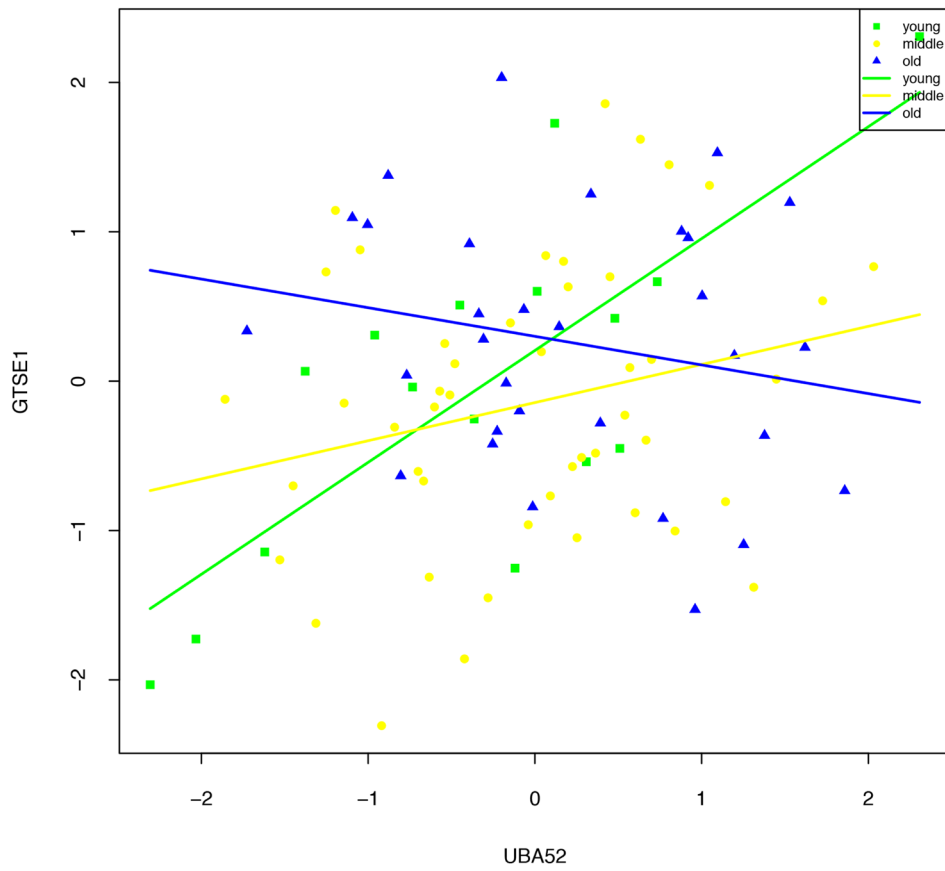



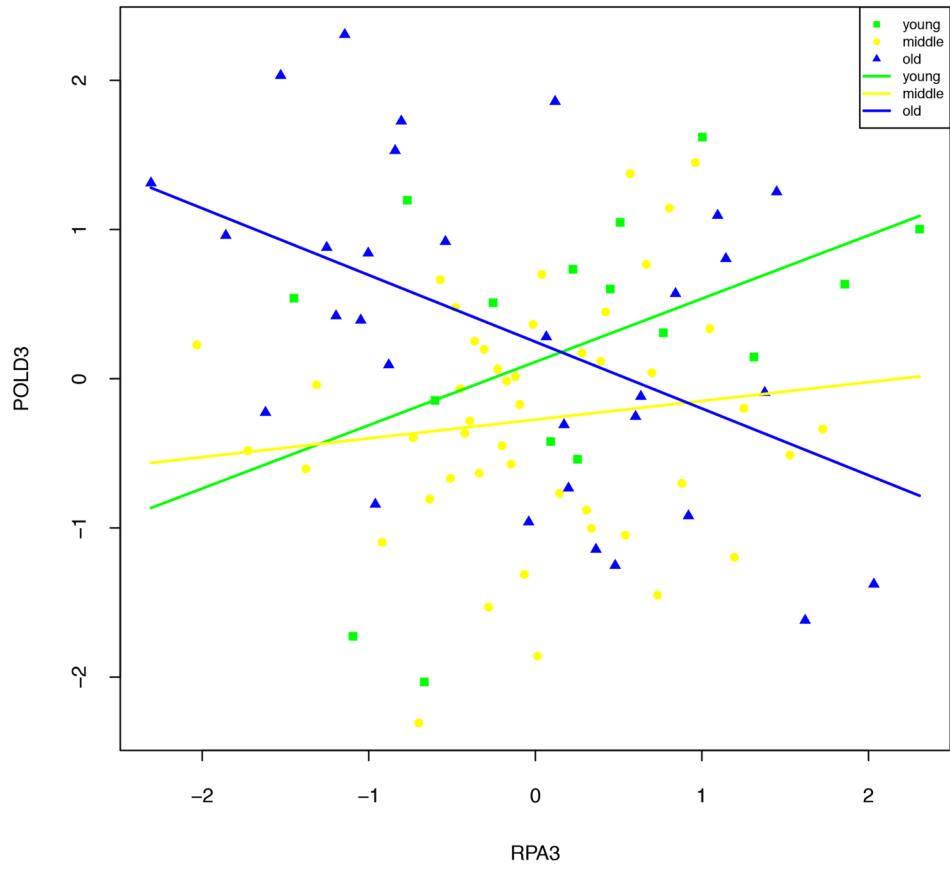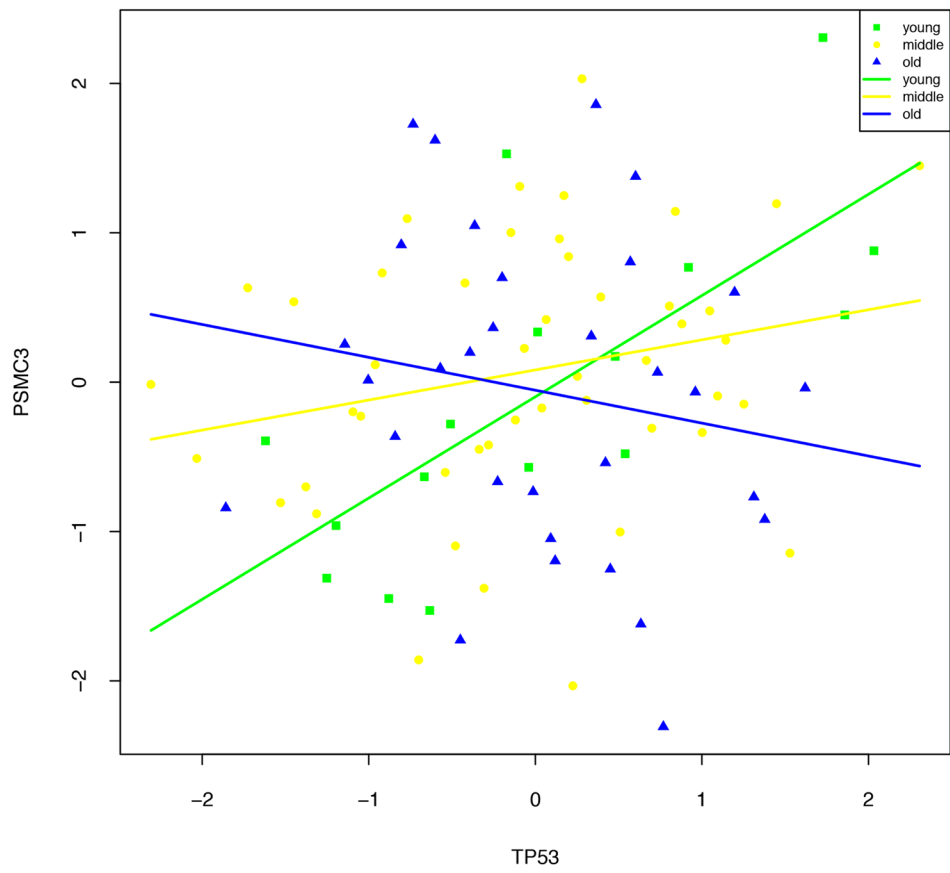

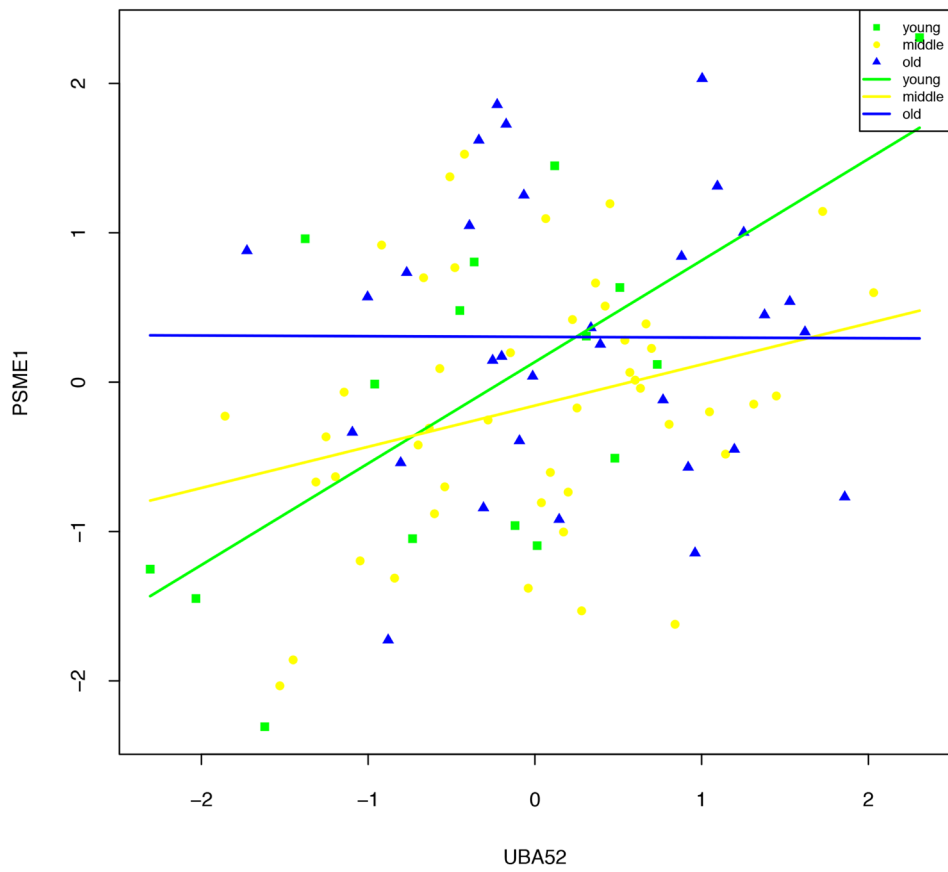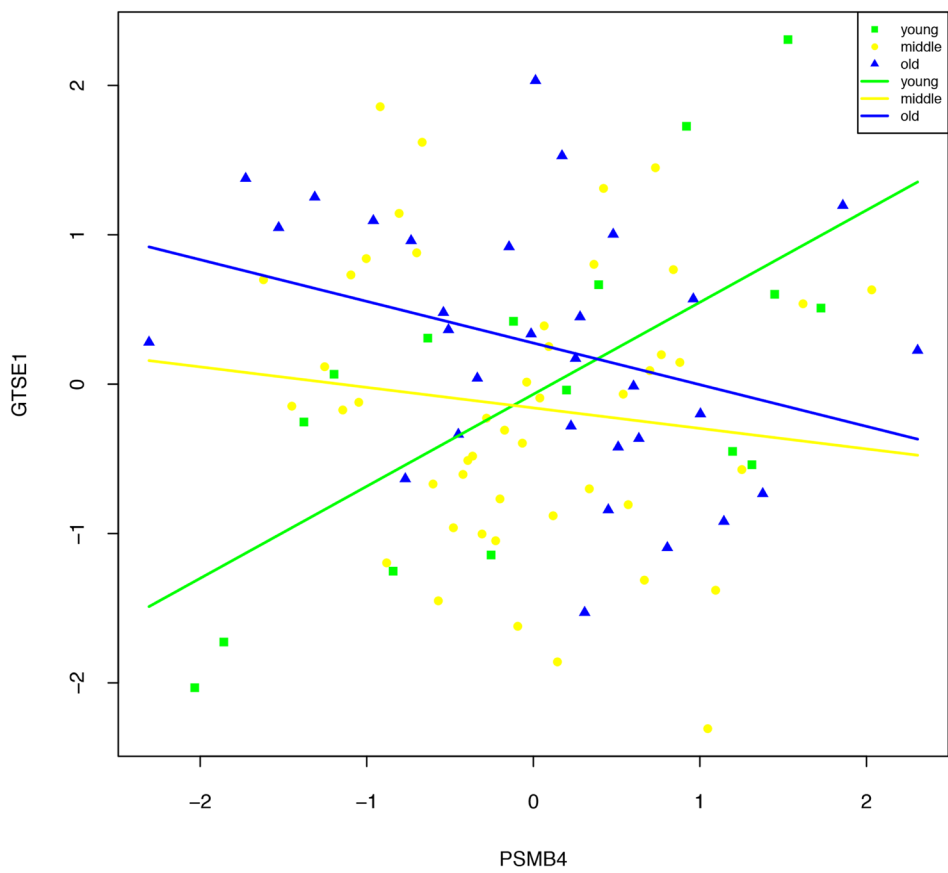

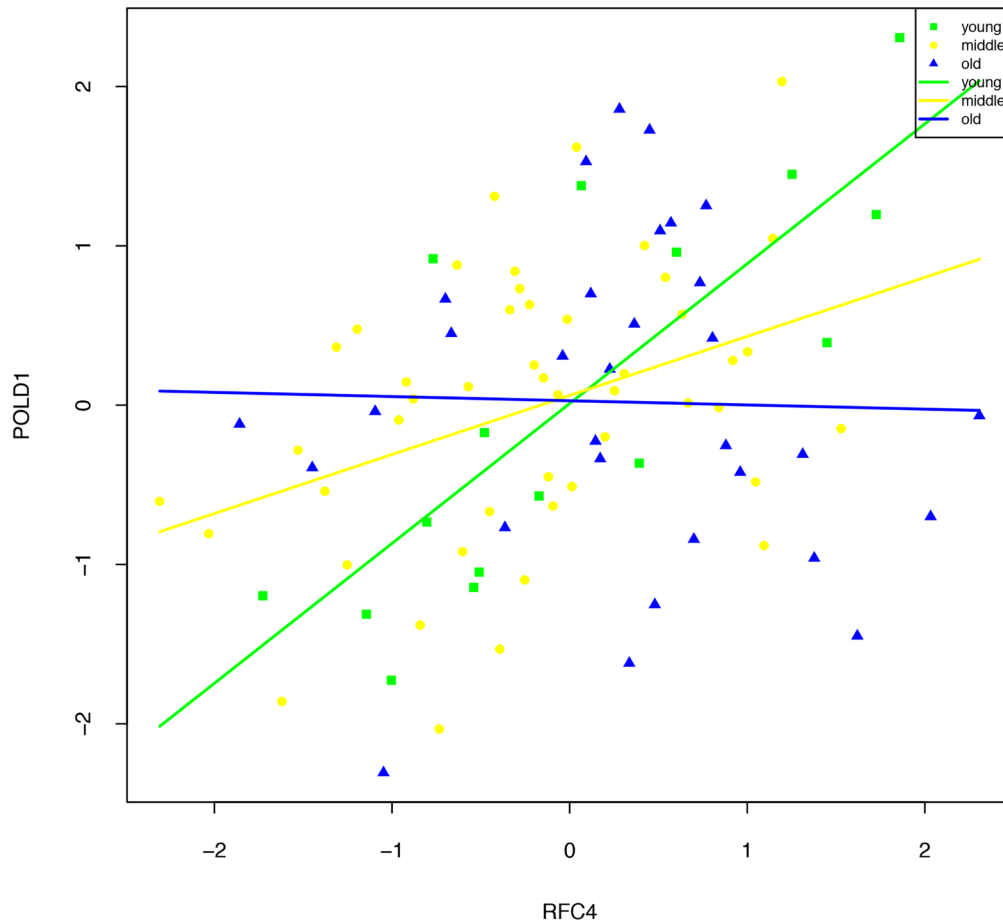

**Supplementary Figure 1: Group-based gene-gene correlation of top 20 age-associated gene co-expressions for adipose tissue.**

**Supplementary Table 1: Liquid associated gene pairs sorted by their occurrences at GO and KEGG modules.** See Supplementary\_Table\_1

**Supplementary Table 2: Fisher exact test results of the detected gene pairs by liquid association and Pearson correlation coefficient.** See Supplementary\_Table\_2

**Supplementary Table 3: Functional annotations by the David tools for all the tissues.** See Supplementary\_Table\_3

**Supplementary Table 4: Results of testing the consistency of drug perturbation genes with significant up-regulated genes and down regulated genes for 4295 drugs.** See Supplementary\_Table\_4
